# Supplementary material
Source: PubMed Central journal article supplement (PMC7613635)
Supplement: EMS153045-supplement-Supplementary_Information.pdf [file EMS153045-supplement-Supplementary_Information.pdf]

**Supplementary Table 1. Primers and oligonucleotides used in this study.**

| Name                        | Sequence (5' to 3')                                                                                                                                 | Nt  | Description                                                                                                                      |
|-----------------------------|-----------------------------------------------------------------------------------------------------------------------------------------------------|-----|----------------------------------------------------------------------------------------------------------------------------------|
| Phospho-loop forward primer | GTTACAACCTCTGCTGCCAACGAGGCTTTCT<br>GTCTGGAGATTC                                                                                                     | 44  | Used to linearize the pACEBac FANCI <sup>WT</sup> and insert gBlocks encoding mutations in the phospho-loop region               |
| Phospho-loop reverse primer | AAGTTACGCAGCAGCAGCAGAAAACCGG<br>CTACAG                                                                                                              | 44  | Used to linearize the pACEBac FANCI <sup>WT</sup>                                                                                |
| gBlock FANCI <sup>3D</sup>  | GTTTTCTGCTGCTGCTGCGTAACTTCAAGA<br>TCCTGGGTTCTCTGACCTCTGATCAGTGTG<br>ATCAGGCAATCGGTGCTGATCAGGTTTCAG<br>GCAGACGTTACGCTTGTTACAACCTCTGCT<br>GCCAACGAGGC | 130 | gBlock encoding S558D, S561D and T567D mutations that was inserted by Gibson cloning into linearized pACEBac FANCI <sup>WT</sup> |
| gBlock FANCI <sup>3A</sup>  | GTTTTCTGCTGCTGCTGCGTAACTTCAAGA<br>TCCTGGGTTCTCTGACCTCTGCCAGTGTG<br>CACAGGCAATCGGTGCTGCCAGGTTTCAG<br>GCAGACGTTACGCTTGTTAC<br>AACTCTGCTGCCAACGAGGC    | 130 | gBlock encoding S558A, S561A and T567A mutations that was inserted by Gibson cloning into linearized pACEBac FANCI <sup>WT</sup> |
| gBlock FANCI <sup>3K</sup>  | GTTTTCTGCTGCTGCTGCGTAACTTCAAGA<br>TCCTGGGTTCTCTGACCTCTAAACAGTGTG<br>AACAGGCAATCGGTGCTAAACAGGTTTCAG<br>GCAGACGTTACGCTTGTTACAACCTCT<br>GCTGCCAACGAGGC | 130 | gBlock encoding S558K, S561K and T567K mutations that was inserted by Gibson cloning into linearized pACEBac FANCI <sup>WT</sup> |
| gBlock FANCI <sup>Dxx</sup> | GTTTTCTGCTGCTGCTGCGTAACTTCAAGA<br>TCCTGGGTTCTCTGACCTCTGATCAGTGTG<br>CTCAGGCAATCGGTGCTACTCAGGTTTCAG<br>GCAGACGTTACGCTTGTTACAACCTCTGCT<br>GCCAACGAGGC | 130 | gBlock encoding S558D mutation that was inserted by Gibson cloning into linearized pACEBac FANCI <sup>WT</sup>                   |
| gBlock FANCI <sup>DxD</sup> | GTTTTCTGCTGCTGCTGCGTAACTTCAAGA<br>TCCTGGGTTCTCTGACCTCTTCCAGTGTG<br>ATCAGGCAATCGGTGCTACTCAGGTTTCAG<br>GCAGACGTTACGCTTGTTACAACCTCTGCT<br>GCCAACGAGGC  | 130 | gBlock encoding S561D mutation that was inserted by Gibson cloning into linearized pACEBac FANCI <sup>WT</sup>                   |
| gBlock FANCI <sup>DxD</sup> | GTTTTCTGCTGCTGCTGCGTAACTTCAAGA<br>TCCTGGGTTCTCTGACCTCTTCCAGTGTG<br>CTCAGGCAATCGGTGCTGATCAGGTTTCAG<br>GCAGACGTTACGCTTGTTACAACCTCTGCT<br>GCCAACGAGGC  | 130 | gBlock encoding T567D mutation that was inserted by Gibson cloning into linearized pACEBac FANCI <sup>WT</sup>                   |
| gBlock FANCI <sup>DDx</sup> | GTTTTCTGCTGCTGCTGCGTAACTTCAAGA<br>TCCTGGGTTCTCTGACCTCTGATCAGTGTG<br>ATCAGGCAATCGGTGCTACTCAGGTTTCAG<br>GCAGACGTTACGCTTGTTACAACCTCTGCT<br>GCCAACGAGGC | 130 | gBlock encoding S558D and S561D mutations that was inserted by Gibson cloning into linearized pACEBac FANCI <sup>WT</sup>        |
| gBlock FANCI <sup>DxD</sup> | GTTTTCTGCTGCTGCTGCGTAACTTCAAGA<br>TCCTGGGTTCTCTGACCTCTGATCAGTGTG<br>CTCAGGCAATCGGTGCTGATCAGGTTTCAG<br>GCAGACGTTACGCTTGTTACAACCTCTGCT<br>GCCAACGAGGC | 130 | gBlock encoding S558D and T567D mutations that was inserted by Gibson cloning into linearized pACEBac FANCI <sup>WT</sup>        |
| gBlock FANCI <sup>DDD</sup> | GTTTTCTGCTGCTGCTGCGTAACTTCAAGA<br>TCCTGGGTTCTCTGACCTCTTCCAGTGTG<br>ATCAGGCAATCGGTGCTGATCAGGTTTCAG                                                   | 130 | gBlock encoding S561D and T567D mutations that was inserted by Gibson cloning                                                    |

|                                              |                                                                                  |    |                                                                                                   |
|----------------------------------------------|----------------------------------------------------------------------------------|----|---------------------------------------------------------------------------------------------------|
|                                              | GCAGACGTTACGCTTGTTACAACCTCTGCT<br>GCCAACGAGGC                                    |    | into linearized pACEBac<br>FANCI <sup>WT</sup>                                                    |
| Loop deletion<br>forward primer              | GAGGCTTTCTGTCTGGAGATTCTGGGCTCC<br>CTGCG                                          | 35 | Primer used to delete<br>residues 555-582 of FANCI<br>from pACEBac FANCI <sup>WT</sup>            |
| Loop deletion<br>reverse primer              | AGAACCCAGGATCTTGAAGTTACGCAGCA<br>GCAGCAG                                         | 36 | Primer used to delete<br>residues 555-582 of FANCI<br>from pACEBac FANCI <sup>WT</sup>            |
| 44-P1                                        | ATCGATGTCTCTAGACAGCTGCTCAGGAT<br>TGATCTGTAATGGCC                                 | 44 | Annealed with 44-P7 and<br>used in assays                                                         |
| 44-P1/36-FAM/                                | ATCGATGTCTCTAGACAGCTGCTCAGGAT<br>TGATCTGTAATGGCC/36-FAM/                         | 44 | Annealed with 44-P7 and<br>used in all assays and for<br>structural analysis                      |
| 44-P7                                        | GGCCATTACAGATCAATCCTGAGCAGCTG<br>TCTAGAGACATCGAT                                 | 44 | Annealed with 44-P1 or 44-<br>P1/36-FAM/ and used in all<br>assays and for structural<br>analysis |
| Nano-lever A<br>(NLA)                        | TAGTGCTGTAGGAGAATATACGGGCTGCT<br>CGTGTTGACAAGTACTGAT                             | 48 | Tethered to the<br>SwitchSENSE chip                                                               |
| Nano-lever B<br>(NLB)                        | TAGTCGTAAGCTGATATGGCTGATTAGTC<br>GGAAGCATCGAACGCTGAT                             | 48 | Tethered to the<br>SwitchSENSE chip                                                               |
| Complementary<br>NLA-stem16<br>(cNLA-stem16) | GCGGCATACAACACTCACAACCGCATCAG<br>TATGTCAACACGAGCAGCCCGTATATTCC<br>TCTACAGCACTA   | 72 | Annealed to NLA tethered to<br>the SwitchSENSE chip                                               |
| Complementary<br>NLB-stem16<br>(cNLB-stem16) | GCGGCATACAACACTCACAACCGCATCAG<br>CGTTCGATGCTTCCGACTAATCAGCCATAT<br>CAGCTTACGACTA | 72 | Annealed to NLB tethered to<br>the SwitchSENSE chip                                               |
