# Supplementary material
Source: PubMed Central journal article supplement (PMC7613635)

Unmodified SDS-PAGE of Extended Data Fig. 5

Extended Data Fig. 5b

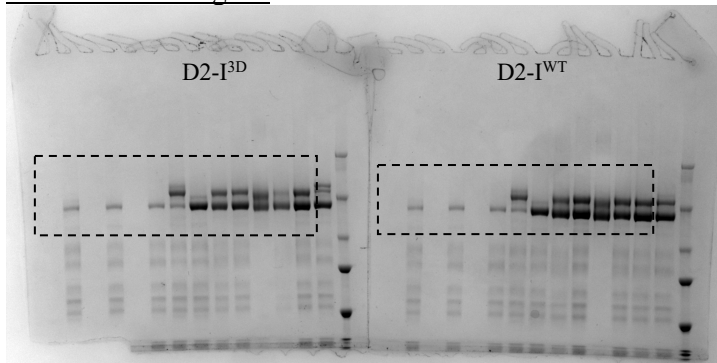

Extended Data Fig. 5c

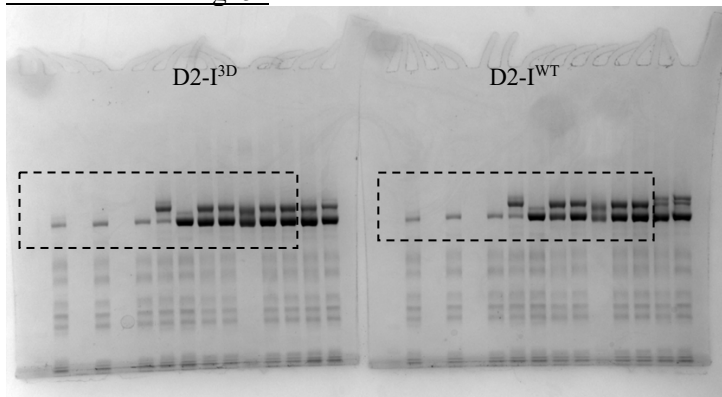

Extended Data Fig. 5d

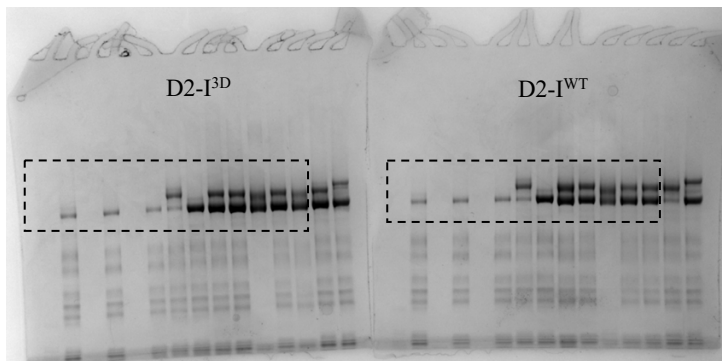

Supplement: EMS153045-supplement-Unmodified_Gels_ED_Fig_5.pdf [file EMS153045-supplement-Unmodified_Gels_ED_Fig_5.pdf]
