# Supplementary material
Source: PubMed Central journal article supplement (PMC7613635)

Unmodified EMSA scans of Extended Data Fig. 4b

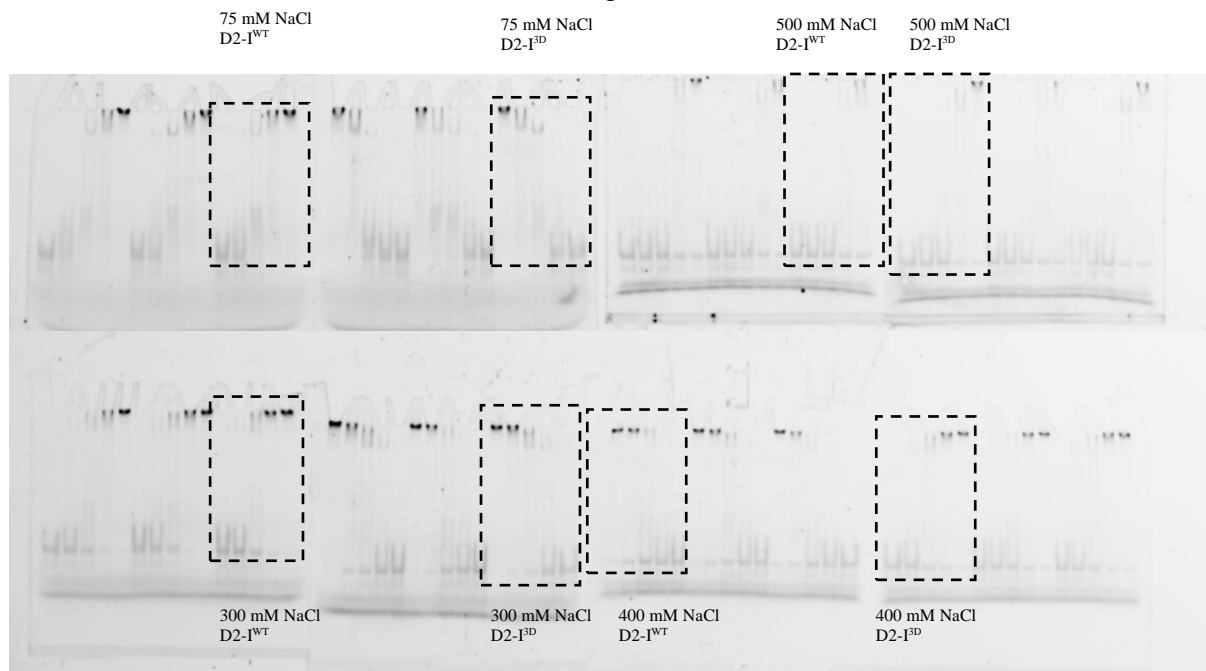

Supplement: EMS153045-supplement-Unmodified_Gels_ED_Fig_4.pdf [file EMS153045-supplement-Unmodified_Gels_ED_Fig_4.pdf]

Unmodified SDS-PAGE of Extended Data Fig. 6a

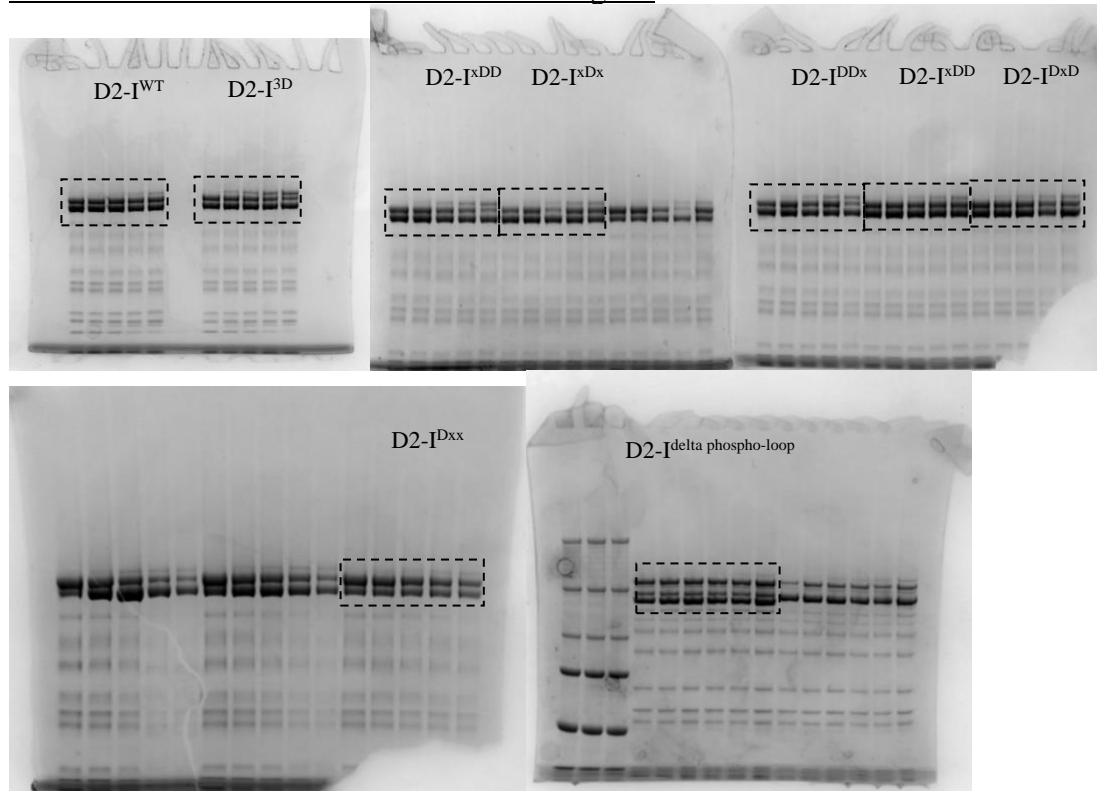

Supplement: EMS153045-supplement-Unmodified_Gels_ED_Fig_6.pdf [file EMS153045-supplement-Unmodified_Gels_ED_Fig_6.pdf]

Unmodified SDS-PAGE of Fig. 5

Fig. 5a

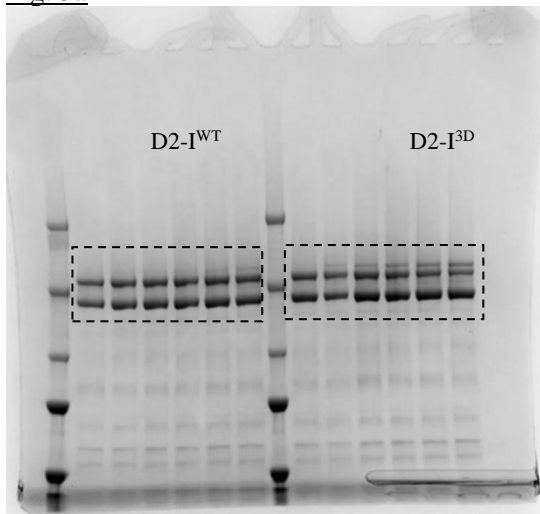

Fig. 5b

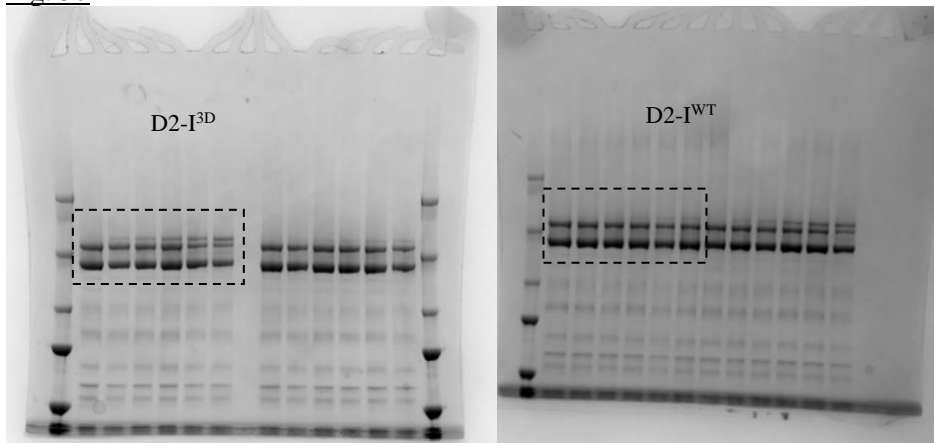

Fig. 5c

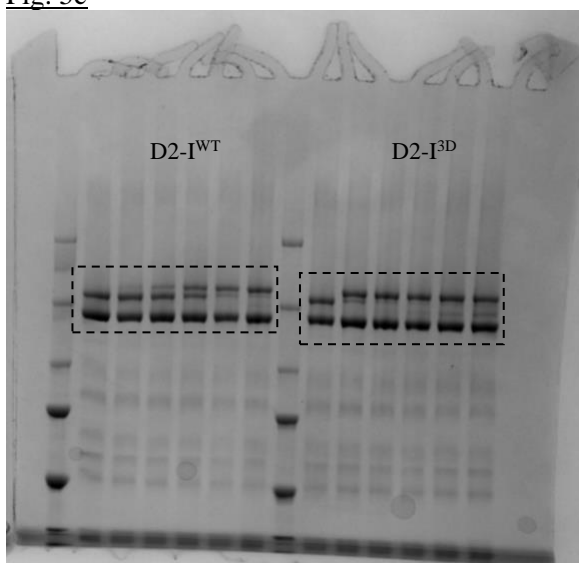

Supplement: EMS153045-supplement-Unmodified_Gels_Fig_5.pdf [file EMS153045-supplement-Unmodified_Gels_Fig_5.pdf]
